# Supplementary material for: Gsα Controls Cortical Bone Quality by Regulating Osteoclast Differentiation via cAMP/PKA and β-Catenin Pathways
Source: PubMed Central journal article supplement (PMC5364530; doi:10.1038/srep45140), 2017-03-24
Supplement: srep45140-s1.pdf [file srep45140-s1.pdf]

**Gs $\alpha$  Controls Cortical Bone Quality by Regulating Osteoclast Differentiation  
via cAMP/PKA and  $\beta$ -Catenin Pathways**

*Girish Ramaswamy<sup>1,5</sup> Hyunsoo Kim<sup>4</sup> Deyu Zhang<sup>1,5</sup>, Vitali Lounev<sup>1,5</sup>, Joy Y Wu<sup>6</sup>, Yongwon Choi<sup>4</sup>, Frederick S Kaplan<sup>1,2,5</sup>, Robert J. Pignolo<sup>7</sup>, Eileen M. Shore<sup>1,3,5</sup>*

**Supplementary Table 1** Bone phenotype in *Gnas* mutant mice at 2 week, 3 and 9 month mice.

|                                      | 2 weeks       |                            |                             | 3 mon         |                            |                             | 9 mon         |                            |                             |
|--------------------------------------|---------------|----------------------------|-----------------------------|---------------|----------------------------|-----------------------------|---------------|----------------------------|-----------------------------|
|                                      | WT            | <i>Gnas</i> <sup>+/-</sup> | <i>Gnas</i> <sup>m-/+</sup> | WT            | <i>Gnas</i> <sup>+/-</sup> | <i>Gnas</i> <sup>m-/+</sup> | WT            | <i>Gnas</i> <sup>+/-</sup> | <i>Gnas</i> <sup>m-/+</sup> |
| Size and Geometric Analyses          |               |                            |                             |               |                            |                             |               |                            |                             |
| Body Weight (g)                      | 8.82 ± 0.9    | 6.88 ± 0.35**              | 7.86 ± 0.64*                | 40.9 ± 3.4    | 35.97 ± 3.56*              | 46.6 ± 0.67                 | 53.28 ± 7.35  | 48.41 ± 4.24               | 59.91 ± 4.37                |
| Femur Length (mm)                    | 9.68 ± 0.47   | 8.8 ± 0.37*                | 8.57 ± 0.56*                | 17.19 ± 0.26  | 16.29 ± 0.5**              | 17.04 ± 0.02                | 17.02 ± 0.45  | 16.29 ± 0.18**             | 16.92 ± 0.72                |
| Moment of Inertia (mm <sup>4</sup> ) | 0.03 ± 0.002  | 0.02 ± 0.002**             | 0.02 ± 0.0001**             | 0.23 ± 0.05   | 0.128 ± 0.06**             | 0.29 ± 0.02*                | 0.31 ± 0.08   | 0.25 ± 0.06**              | 0.36 ± 0.07                 |
| TV - Cortical (mm <sup>3</sup> )     | 0.75 ± 0.1    | 0.66 ± 0.03*               | 0.72 ± 0.13*                | 1.71 ± 0.17   | 1.41 ± 0.21**              | 1.87 ± 0.04*                | 1.88 ± 0.25   | 1.82 ± 0.17                | 2.08 ± 0.2                  |
| Cortical Porosity                    | 10.26 ± 0.86  | 11.01 ± 1.32               | 17.06 ± 2.33**              | 4.74 ± 0.36   | 5.41 ± 0.64                | 4.5 ± 0.18                  | 5.51 ± 1.12   | 6.02 ± 0.8                 | 5.17 ± 0.81                 |
| Trabecular Bone Analyses             |               |                            |                             |               |                            |                             |               |                            |                             |
| TV (mm <sup>3</sup> )                | 0.531 ± 0.025 | 0.416 ± 0.045              | 0.436 ± 0.054               | 2.214 ± 0.254 | 2.004 ± 0.352              | 2.607 ± 0.129               | 2.73 ± 0.281  | 3.068 ± 0.317              | 3.12 ± 0.427                |
| Tb. N (1/mm)                         | 7.697 ± 0.686 | 7.983 ± 0.18               | 7.246 ± 0.29                | 5.746 ± 0.336 | 5.549 ± 0.515              | 5.529 ± 0.305               | 3.81 ± 0.356  | 3.60 ± 0.455               | 3.57 ± 0.277                |
| Tb. Th. (mm)                         | 0.029 ± 0.002 | 0.027 ± 0.001              | 0.027 ± 0.003               | 0.043 ± 0.005 | 0.037 ± 0.007              | 0.048 ± 0.005               | 0.048 ± 0.005 | 0.045 ± 0.003              | 0.048 ± 0.004               |
| Tb. Sp. (mm)                         | 0.131 ± 0.011 | 0.126 ± 0.003              | 0.137 ± 0.007               | 0.166 ± 0.012 | 0.175 ± 0.02               | 0.172 ± 0.011               | 0.26 ± 0.027  | 0.278 ± 0.039              | 0.28 ± 0.025                |

□ *Gnas*<sup>+/+</sup> and *Gnas*<sup>fl/+</sup>

■ *Osx-Cre; Gnas*<sup>+/-</sup>

■ *Osx-Cre; Gnas*<sup>+/+</sup>

■ *Osx-Cre; Gnas*<sup>m/+</sup>

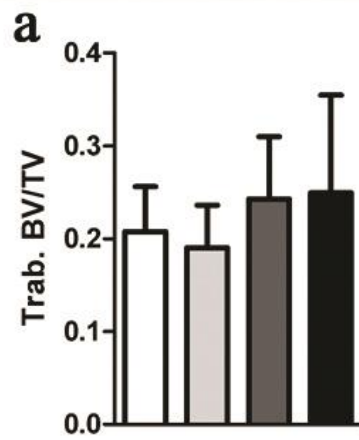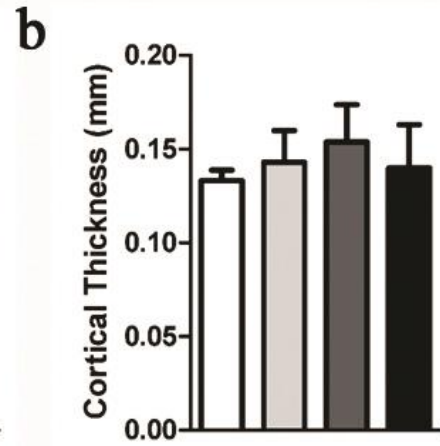

**Supplementary Figure 1** Bone phenotype in mice with heterozygous deletion of *Gnas* in osteoblasts. Quantification of (a) trabecular BV/TV and (b) cortical thickness from mice with paternal and maternal inheritance of heterozygous deletion of *Gsα* in cells expressing osterix at 6 weeks of age (*Osx-Cre; Gnas<sup>+/-</sup>* and *Osx-Cre; Gnas<sup>m-/+</sup>*) shows no differences compared to age-matched controls (*Gnas<sup>+/+</sup>*, *Gnas<sup>f/+</sup>* and *Osx-Cre; Gnas<sup>+/+</sup>*). Data represent mean  $\pm$  SD. N = 4-7 animals per group.

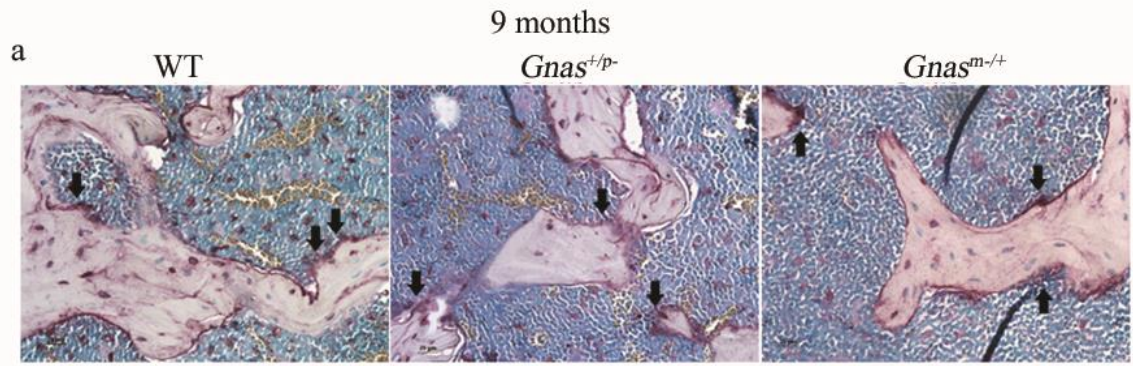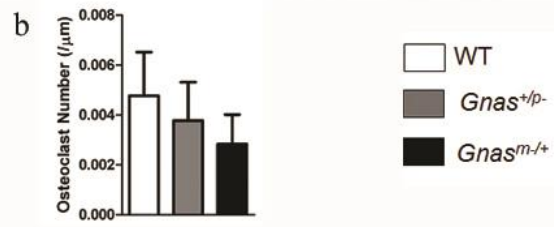

**Supplementary Figure 2** No difference in osteoclast number among the genotypes in trabecular bone at 9 months of age. (a) TRAP staining of metaphyseal trabecular bone at the distal femur. (b) Quantification of the osteoclast number per perimeter in trabecular bone in all genotypes. Data represent mean  $\pm$  SD. N = 3-4 animals per group.

a

WT

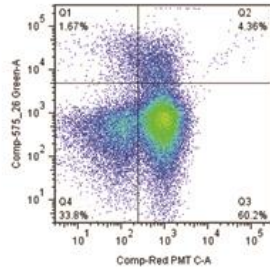

*Gnas*<sup>+/-</sup>

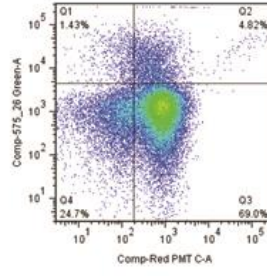

b

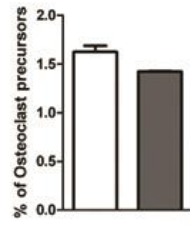

□ WT  
■ *Gnas*<sup>+/-</sup>

**Supplementary Figure 3** *Gnas*<sup>+/-</sup> mice do not show differences in osteoclast precursor population in the bone marrow. (a) Cells from WT and *Gnas*<sup>+/-</sup> bone marrow were analyzed by flow cytometry for CD3<sup>-</sup> CD45R<sup>-</sup> CD11b<sup>-/low</sup> CD115<sup>high</sup> population and their percent was (b) quantified. Data represent mean ± SD. N = 3 mice per group.



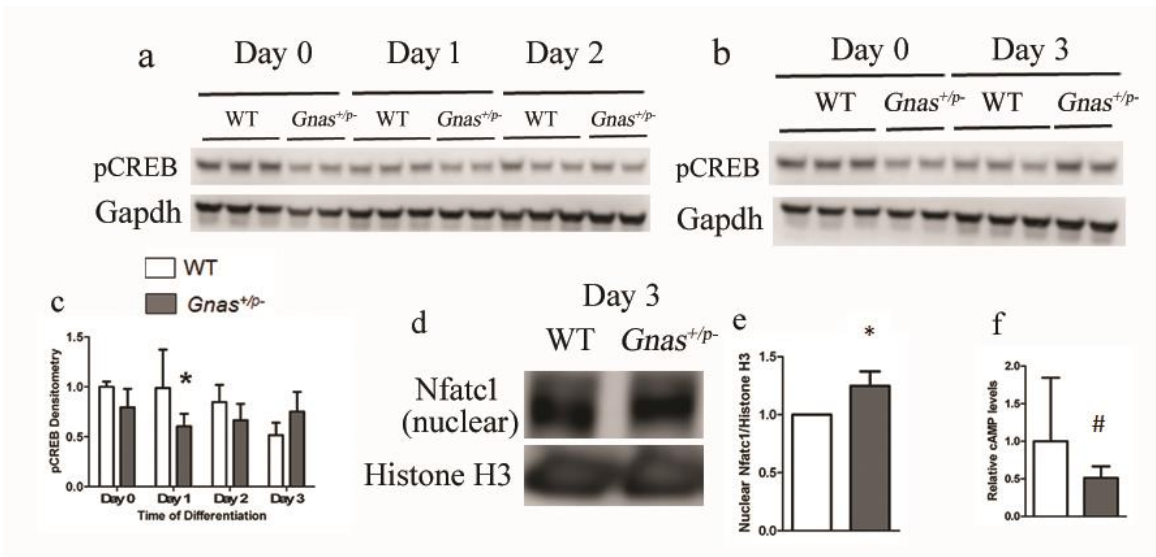

**Supplementary Figure 4** Protein levels of pCREB and Nfatc1 during osteoclast differentiation. Western blots show significant decrease in (a-c) pCREB at day 1 and increase in (d) Nfatc1 at day 3 during osteoclast differentiation in cells from *Gnas*<sup>+/-</sup> over WT cells. (d and e) Nfatc1 was increased in nuclear fractions of *Gnas*<sup>+/-</sup> over WT cells at day 3 of osteoclast differentiation. (f) cAMP levels were reduced in *Gnas*<sup>+/-</sup> macrophages compared to WT cells. WT was set to 1 in e and f. Data represent mean ± SD. Experiments a-c were performed at least 3 times with n = 2-3 animals per group per experiment. Total of 5-7 animals per group from 3 experiments used for quantification. For Nfatc1 nuclear fraction and cAMP measurements, n = 3 biological replicates. \*p < 0.05, #p ≤ 0.1.

a Day 3  
WT *Gnas<sup>m-/+</sup>*

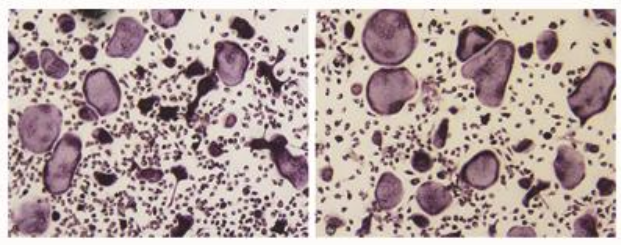

b  
□ WT  
■ *Gnas<sup>m-/+</sup>*

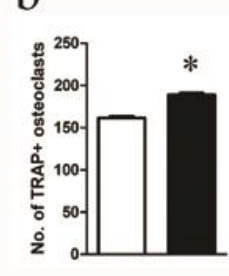

c WT *Gnas<sup>m-/+</sup>*

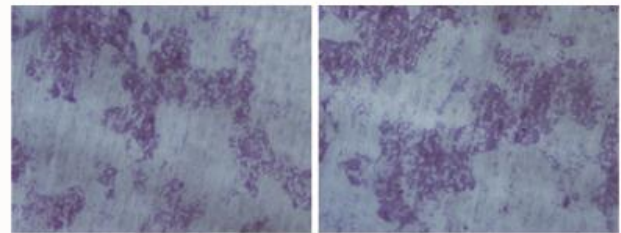

d

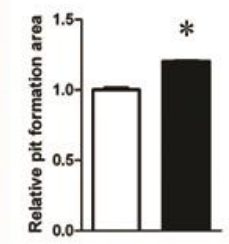

**Supplementary Figure 5.** *Gnas<sup>m/+</sup>* show marginal increase in osteoclastogenesis. (a, b) Bone marrow macrophages from *Gnas<sup>m/+</sup>* mice showed marginal increase in osteoclast differentiation. (c, d) Osteoclasts from *Gnas<sup>m/+</sup>* mice showed modest elevation in resorption areas measured using pit formation assay. WT mean resorption area was set to 1. Data represent mean  $\pm$  SD. Experiments were performed 2 times with n = 2-3 animals per group per experiment. Total of 4-5 animals per group from 2 experiments used for quantification. \*p < 0.05.

a

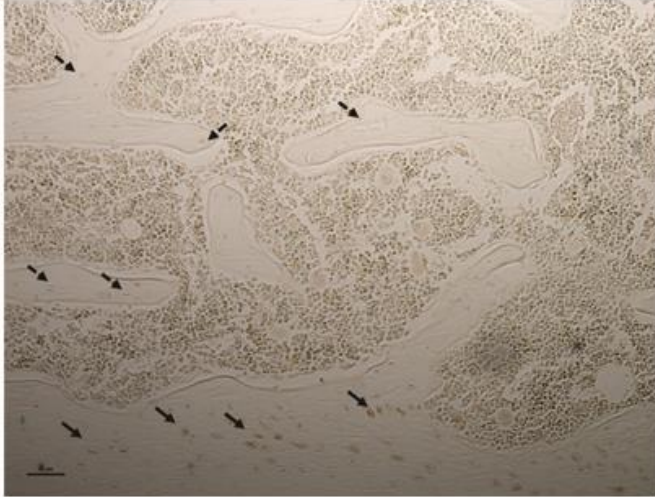

b

□ WT  
■ *Gnas<sup>m/+</sup>*

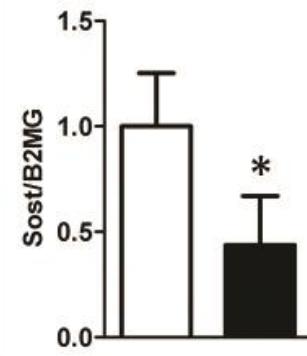

**Supplementary Figure 6.** Sost expression in trabecular bone and *Gnas*<sup>m-/+</sup> femurs. (a) Intensity of sclerostin expression was very low and undetectable in trabecular bone as compared to much stronger staining in cortical bone. Solid arrows represent osteocytes staining for sclerostin in cortical bone and dotted arrows show osteocytes in trabecular bone that does not show detectable levels of sclerostin expression. (b) Sost mRNA expression was significantly reduced in cortical bone of 9 months old *Gnas*<sup>m-/+</sup> mice as compared to WT littermates. Mean of WT was set to 1. Data represent mean ± SD. Total of 4-5 animals per group used for quantification. \*p < 0.05.
